# Supplementary material for: Projected Changes in Extreme Temperature and Precipitation Indices Over CORDEX-MENA Domain
Source: MDPI journal article supplement (doi:10.3390/atmos12050622), 2021-05-12
Supplement: s1 [file s1]

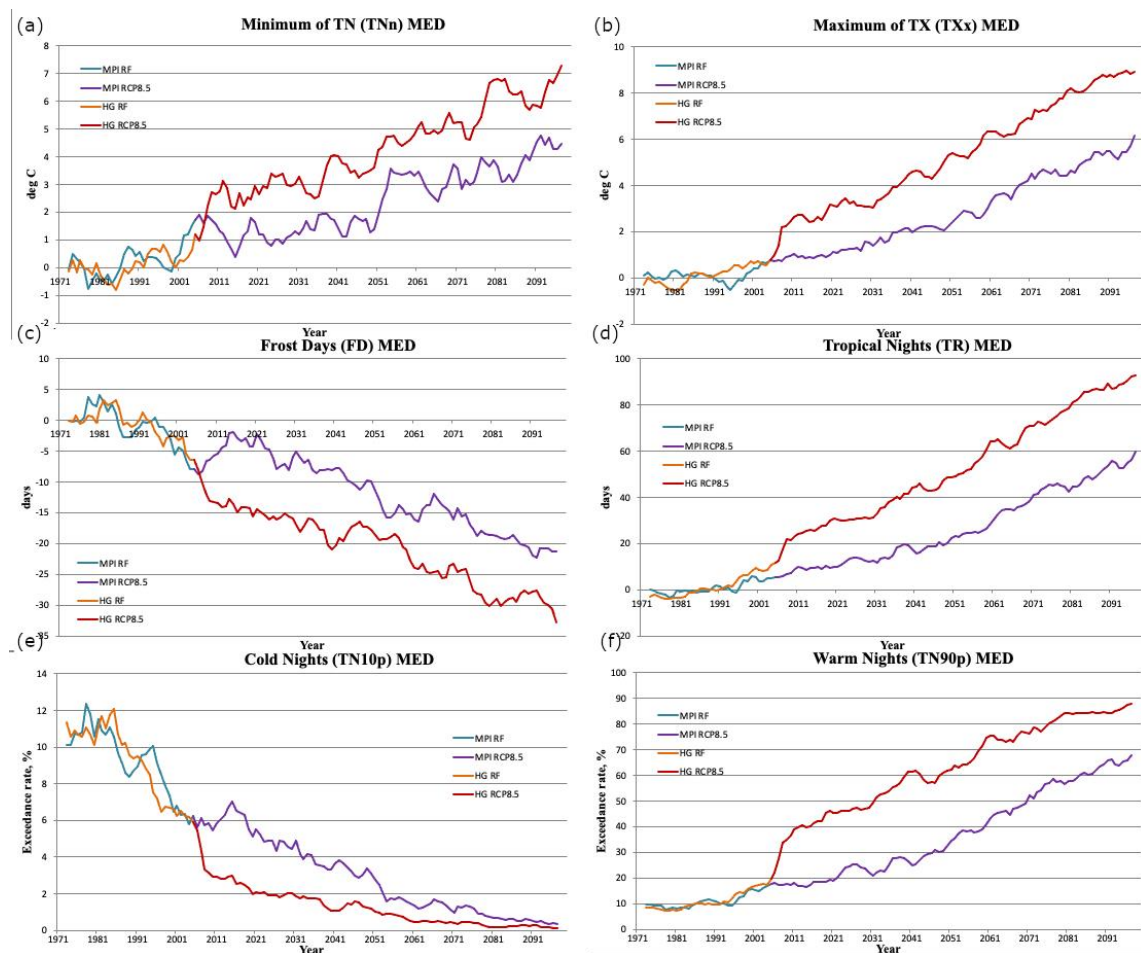

Figure S1 Temporal evolution of spatial averages of temperature indices over Mediterranean for MPI-ESM-MR RF (green line) and with RCP8.5 (purple line) and for HadGEM2-ES RF (orange line) and with RCP8.5 (red line) displayed as anomalies from the reference period 1971-2000 a) minimum of TN, b) maximum of TX, c) frost days, d) tropical nights and displayed as absolute exceedance rates in (%) e) cold nights and f) warm nights. Time series are smoothed with a 5-year running mean filter.

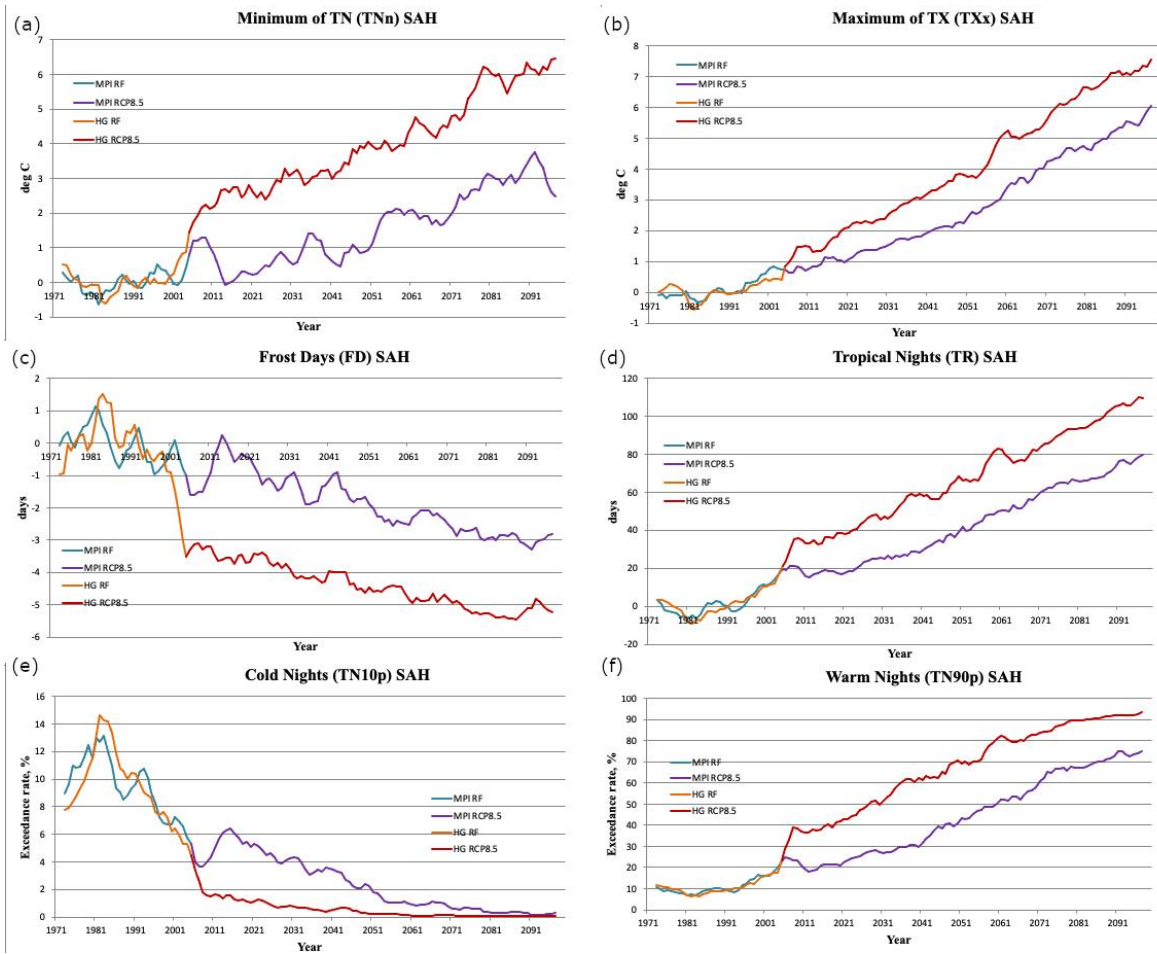

Figure S2 Same as Figure S1, but over Sahara.

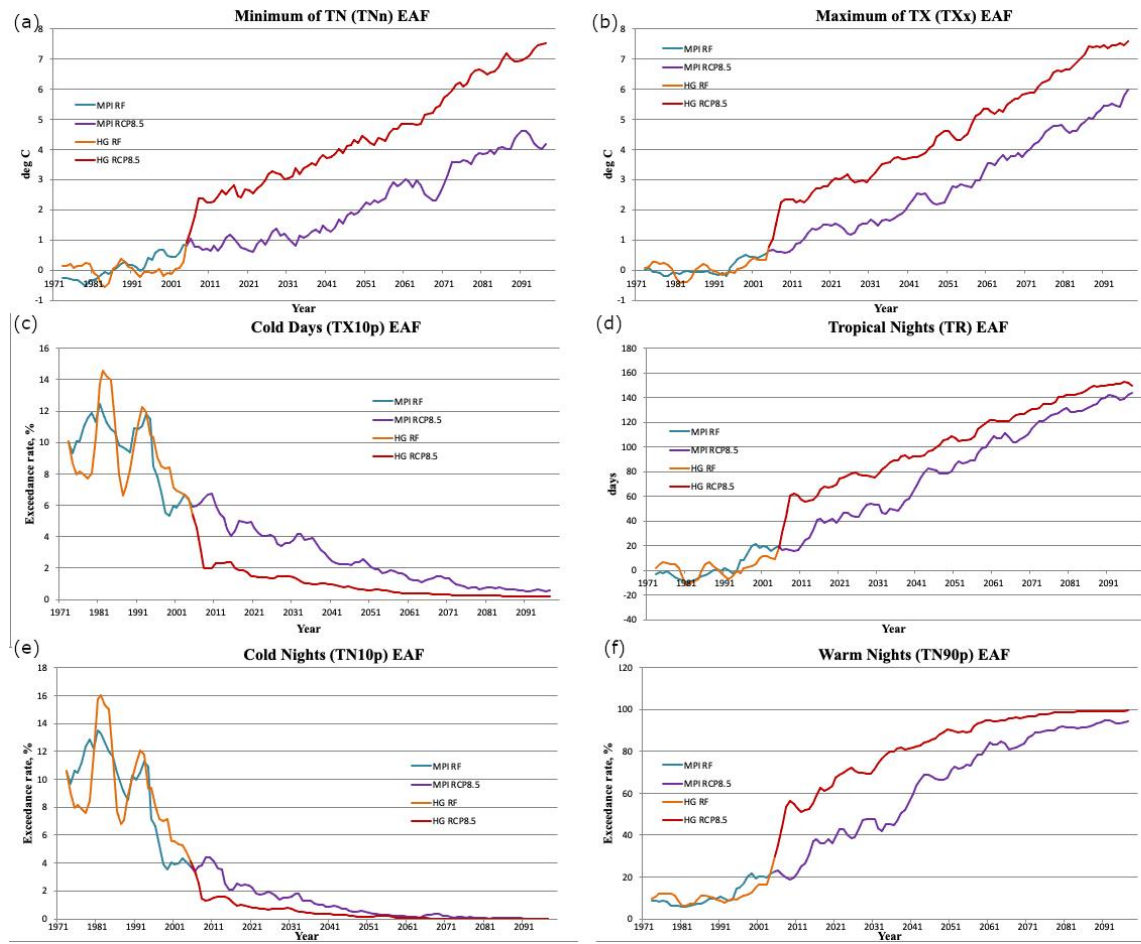

Figure S3 Temporal evolution of spatial averages of temperature indices over East Africa for MPI-ESM-MR RF (green line) and with RCP8.5 (purple line) and for HadGEM2-ES RF (orange line) and with RCP8.5 (red line) displayed as anomalies from the reference period 1971-2000 a) minimum of TN, b) maximum of TX, c) cold days, d) tropical nights and displayed as absolute exceedance rates in (%) e) cold nights and f) warm nights. Time series are smoothed with a 5-year running mean filter.

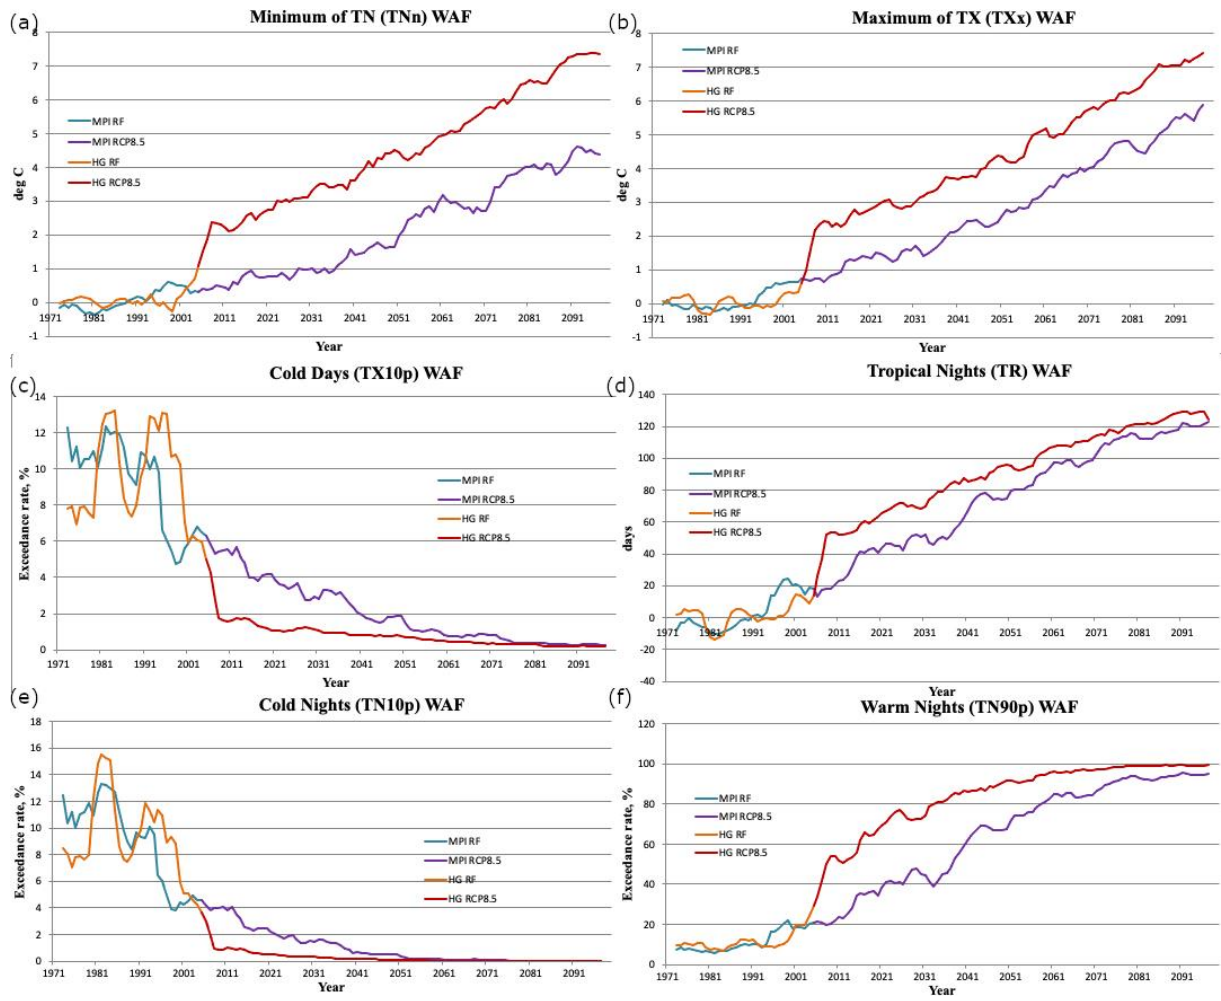

Figure S4 Same as Figure S3, but over West Africa.

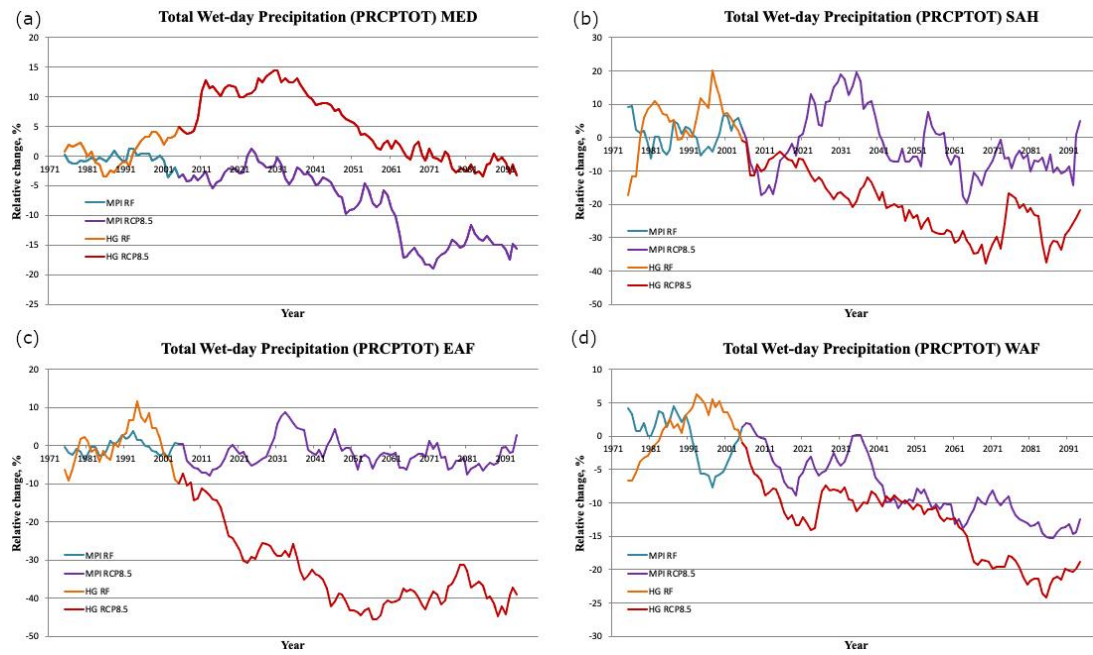

Figure S5 Temporal evolution of spatial averages of total wet-day precipitation for MPI-ESM-MR RF (green line) and with RCP8.5 (purple line) and for HadGEM2-ES RF (orange line) and with RCP8.5 (red line) displayed relative to the reference period 1971-2000 in (%) over a) Mediterranean, b) Sahara, c) East Africa and d) West Africa sub-regions. Time series are smoothed with a 10-year running mean filter.
